# Supplementary material for: Speciation of adsorbed CO2 on metal oxides by a new 2-dimensional approach: 2D infrared inversion spectroscopy (2D IRIS)
Source: Royal Society of Chemistry journal article supplement (doi:10.1039/c3cp51146d), 2013-01-01
Supplement: c3cp51146d.pdf [file c3cp51146d.pdf]

Supporting information to:

## Speciation of adsorbed CO<sub>2</sub> on metal oxides by a new 2-dimensional approach: 2D Infrared Inversion Spectroscopy (2D IRIS)

P. Stelmachowski,<sup>a,b</sup> S. Sirotin,<sup>a</sup> P. Bazin,<sup>a</sup> F. Maugé,<sup>a</sup> and A. Travert,<sup>\*,a</sup>

a) Laboratoire Catalyse et Spectrochimie, ENSICAEN – Université de Caen – CNRS, 6, Boulevard du Maréchal Juin, 14050 Caen cedex, France

b) Jagiellonian University, Faculty of Chemistry, ul. Ingardena 3, 30-060 Kraków, Poland

\* E-mail: arnaud.travert@ensicaen.fr

This section details the procedure used to obtain the energy distribution functions from the experimental isotherms. Being merely similar for both types of isotherms, the method is detailed for the more general case of spectroscopic isotherms. In essence, the method is a straightforward extension of the method proposed by Wilson<sup>1</sup> to a 2-dimensional case.

The spectroscopic isotherm (absorbances vs. pressure) is expressed as:

$$a(\nu, p) = \int_{g_{min}}^{g_{max}} \theta(p, g) f(\nu, g) dg \quad (1)$$

where  $a(\nu, p)$  is the absorbance at wavenumber  $\nu$  and pressure  $p$ ,  $g$  is the reduced Gibbs free energy of adsorption ( $g = -\ln K = \Delta_{ads}G/RT$ ), and  $\theta(p, g)$  is the functional dependence which is expected to hold between pressure and the coverage of surface sites. For a Langmuir isotherm:

$$\theta(p, g) = 1/(e^g + p/p^0) \quad (2)$$

$f(\nu, g)$  is the function describing the energy distribution of the adsorption sites leading to adsorbed species absorbing at wavenumber  $\nu$ :

$$f(\nu, g)dg = N(g)\epsilon(\nu, g)/A \quad (3)$$

where  $N(g)$  is the number of sites leading to a reduced Gibbs free energy of adsorption between  $g$  and  $g + dg$ ,  $\epsilon(\nu, g)$  is the absorption coefficient of the corresponding adsorbed species and  $A$  the geometric surface of the pellet.

In order to discretize Eqn (1), the spectroscopic isotherm  $a(\nu, p)$ , the kernel function  $\theta(p, g)$  and the energy distribution function  $f(\nu, g)$  are represented by matrixes which elements are given by:

$$\begin{aligned} a_{ij} &= a(\nu_i, p_j) & i = 1, \dots, m; j = 1, \dots, n \\ \theta_{jk} &= \theta(p_j, g_k) & k = 1, \dots, q \\ f_{ki} &= f(\nu_i, g_k) \end{aligned} \quad (4)$$

The  $q$   $g_k$  values are linearly spaced in the interval  $[g_{min}, g_{max}]$ :

$$\begin{aligned} g_k &= g_{min} + (k-1)\Delta g \\ \text{with } \Delta g &= (g_{max} - g_{min})/(q-1) \end{aligned} \quad (5)$$

The left-hand side integral of Eq (1) is approximated by a numerical quadrature, consisting in approximating the integral by the weighted sum of the values of the function under integral:

$$\int_{g_{min}}^{g_{max}} \theta(p, g) f(\nu, g) dg \approx \sum_{k=1}^q w_k \theta_{jk} f_{ki} \quad (6)$$

where the weighting coefficients  $w_k$  are given by:

$$w_k = \begin{cases} \Delta g, & 2 \leq k \leq q-1 \\ \Delta g/2, & k = 1, q. \end{cases} \quad (7)$$

Discretization of equation (1) thus results in the following system of linear algebraic equations:

$$a_{ij} = \sum_{k=1}^q w_k \theta_{jk} f_{ki} \quad (8)$$

Denoting:

$$\Theta_{jk} = w_k \theta_{jk} \quad (9)$$

the following matrix equation is obtained:

$$\mathbf{a} = \Theta \mathbf{f} \quad (10)$$

Denoting  $\mathbf{a}_i$  and  $\mathbf{f}_i$  the vectors of absorbance values  $a_{ij}$  and energy distribution function values  $f_{ki}$  at the wavenumber  $\nu_i$ , this linear system could be solved with respect to  $\mathbf{f}$  by minimizing the residuals using a least-squares method, i.e. by minimizing:

$$\begin{aligned} \phi_{LS}(\mathbf{f}) &= \sum_i \|\Theta \mathbf{f}_i - \mathbf{a}_i\|^2 \\ &= \sum_i (\Theta \mathbf{f}_i - \mathbf{a}_i)^T (\Theta \mathbf{f}_i - \mathbf{a}_i) \end{aligned} \quad (11)$$

with the additional constraint that  $\mathbf{f}$  is positive ( $f_{ki} \geq 0$ ), see Eqn 3.

However, because of the smoothness of the kernel  $\Theta$ , which varies slowly with  $g_k$ , this is a numerically ill-posed problem: the optimum solutions  $\mathbf{f}_i$  are unstable with respect to slight variations in the experimental data  $\mathbf{a}_i$  and may present spurious oscillations.<sup>2,3</sup> The usual procedure to tackle such problems is the Tikhonov regularization and consists in enforcing the smoothness of the solution by adding a weighted constraint to the objective function to be minimized:<sup>4</sup>

$$\phi_{reg}(\mathbf{f}) = \phi_{LS}(\mathbf{f}) + \lambda S(\mathbf{f}) \quad (12)$$

where  $\lambda$  is the regularization parameter ( $\lambda \geq 0$ ) which controls the level of smoothing to be applied and  $S(\mathbf{f})$  is a measure of the smoothness of  $\mathbf{f}$  in the energy dimension. Common choices for  $S(\mathbf{f})$  are the norm of  $\mathbf{f}$  or the norm of its second derivative with respect to  $g$ . In the present case, both criteria led to similar solutions and the latter criterion was chosen by approximating the second derivative by finite differences and its norm was calculated by the numerical quadrature:

$$S(\mathbf{f}) = \|\partial^2 \mathbf{f} / \partial g^2\|^2 \approx \sum_i \sum_{k=0}^{q+1} (f_{(k-1)i} - 2f_{ki} + f_{(k+1)i})^2 \Delta g / (\Delta g)^4 \quad (13)$$

where  $f_{(-1)i} = f_{0i} = f_{qi} = f_{(q+1)i} = 0$ . This choice enforces the solution to be smoothed towards zero values at  $g_{min}$  and  $g_{max}$  which is appropriate for a distribution function. With this choice, Eqn (13) can be expressed as a matrix equation:

$$S(\mathbf{f}) = \sum_i \mathbf{f}_i^T \mathbf{S} \mathbf{f}_i \quad (14)$$

where  $\mathbf{S}$  is the symmetric matrix defined by:

$$\mathbf{S} = \frac{1}{(\Delta g)^3} \begin{pmatrix} 6 & -4 & 1 & 0 & \dots & 0 & 0 \\ -4 & 6 & -4 & 1 & \dots & 0 & 0 \\ 1 & -4 & 6 & -4 & \dots & 0 & 0 \\ 0 & 1 & -4 & 6 & \dots & 0 & 0 \\ \vdots & \vdots & \vdots & \vdots & \ddots & \vdots & \vdots \\ 0 & 0 & 0 & 0 & \dots & 6 & -4 \\ 0 & 0 & 0 & 0 & \dots & -4 & 6 \end{pmatrix}$$

Using equations (11) and (14), equation (12) becomes:

$$\phi_{reg}(\mathbf{f}) = \sum_i (\Theta \mathbf{f}_i - \mathbf{a}_i)^T (\Theta \mathbf{f}_i - \mathbf{a}_i) + \lambda \mathbf{f}_i^T \mathbf{S} \mathbf{f}_i \quad (15)$$

After expansion of and dropping the constant term, the problem of minimizing  $\phi_{reg}[\mathbf{f}]$  amounts to solve the  $m$  quadratic programming (QP) problems:

$$\Phi_{reg}[\mathbf{f}_i] = \mathbf{f}_i^T (\Theta^T \Theta + \lambda \mathbf{S}) \mathbf{f}_i - 2\mathbf{a}_i^T \Theta \mathbf{f}_i \quad (16)$$

with the non-negativity constraint, which can be solved by most of numerical computational packages under its standard form, i.e. minimize:

$$\Phi_{reg}(\mathbf{f}_i) = \frac{1}{2} \mathbf{f}_i^T \mathbf{Q} \mathbf{f}_i + \mathbf{c}^T \mathbf{f}_i \quad (17)$$

With  $\mathbf{Q} = 2\Theta^T \Theta + 2\lambda \mathbf{S}$  and  $\mathbf{c} = -2\Theta^T \mathbf{a}_i$  subject to the constraint  $\mathbf{f}_i \geq 0$ .

For the present study, the numerical calculations were carried out with Matlab 7.10.0 using the *quadprog* routine to solve the quadratic programming problem (Eqn. 17).

The inversion of the gravimetric isotherm was carried out using the same procedure, with the exception that  $\mathbf{a}$  (mass changes) and  $\mathbf{f}$  (distribution function) are vectors.

- 1 J. D. Wilson, *Journal of Materials Science*, 1982, **27**, 3911-3924.
- 2 J. Mroczka and D. Szczuczynski, *Metrology and Measurement Systems*, 2009, **XVI**, 333-357.
- 3 S. I. Kabanikhin, *Inverse and Ill-posed Problems. Theory and Applications*, De Gruyter, 2011.
- 4 A. N. Tikhonov and V. Y. Arsenin, *Solutions for Ill-Posed Problems*, Winston & Sons, Washington DC, 1977.
